# Supplementary material
Source: publisher figshare collection journal article supplement (https://karger.figshare.com/ndownloader/files/33025772)
Supplement: Supplementary file 1 [file 33025772]

Table 1S

*Individual intelligibility scores (%) from transcription of sentences from the Swedish Test*

*of Intelligibility (STI) and sentences and target content words from picture description*

| Speaker | STI | Sentences  -contexta | Sentences  +contextb | Words  -contexta | Words +contextb |
| --- | --- | --- | --- | --- | --- |
| Sp 1  Sp 2  Sp 3  Sp 4  Sp 5  Sp 6  Sp 7  Sp 8  Sp 9  Sp 10  Sp 11 | 62  27  74  69  86  77  74  92  88  93  93 | 42  64  67  58  69  69  81  85  86  85  93 | 56  88  76  60  79  87  82  94  88  95  92 | 46  39  50  86  68  86  93  89  96  93  100 | 54  71  68  86  93  96  89  93  96  100  96 |

a -context = listeners not knowing the context

b +context = listeners knowing the context
